# Supplementary material for: Use of transcriptome sequencing to understand the pistillate flowering in hickory (Carya cathayensis Sarg.)
Source: BMC Genomics. 2013 Oct 10;14:691. doi: 10.1186/1471-2164-14-691 (PMC3853572; doi:10.1186/1471-2164-14-691)

Relative expression quantity

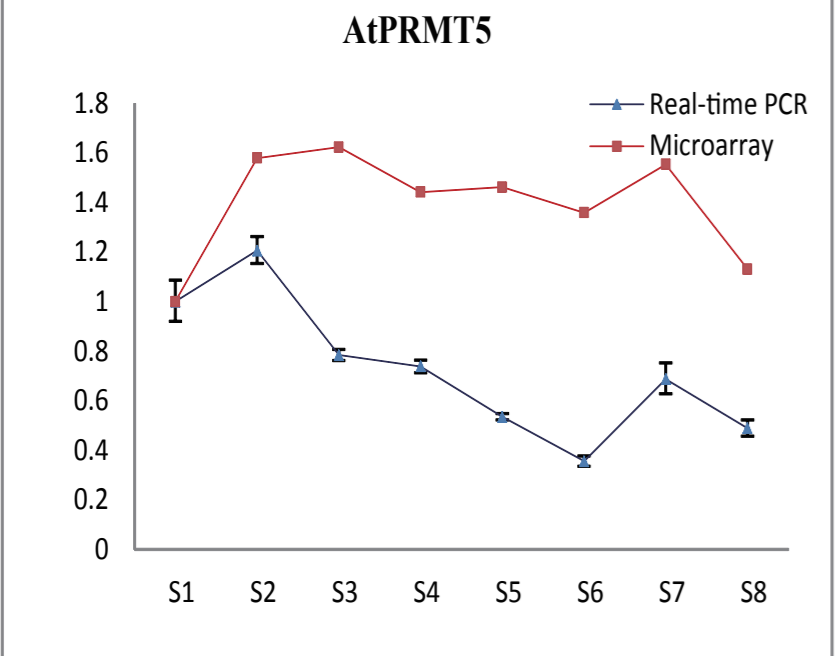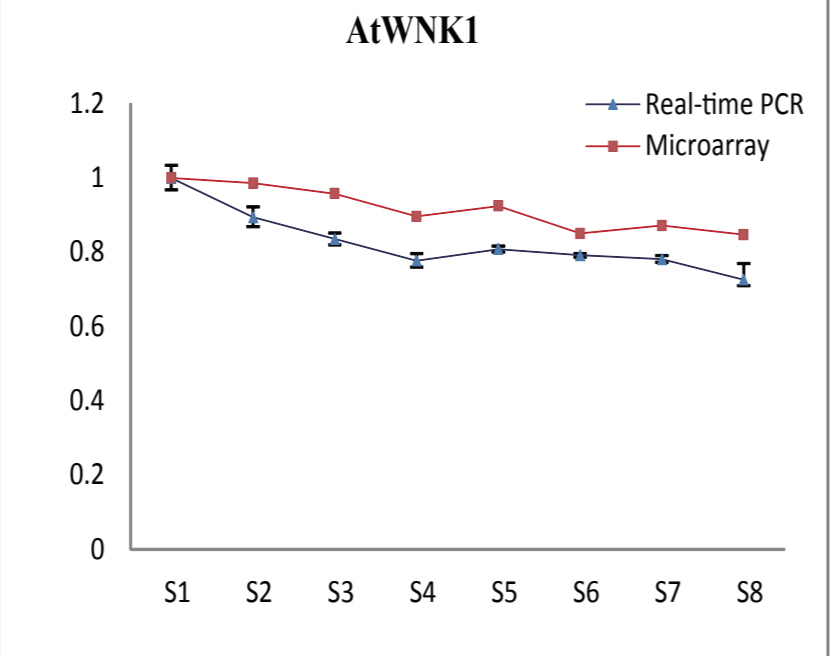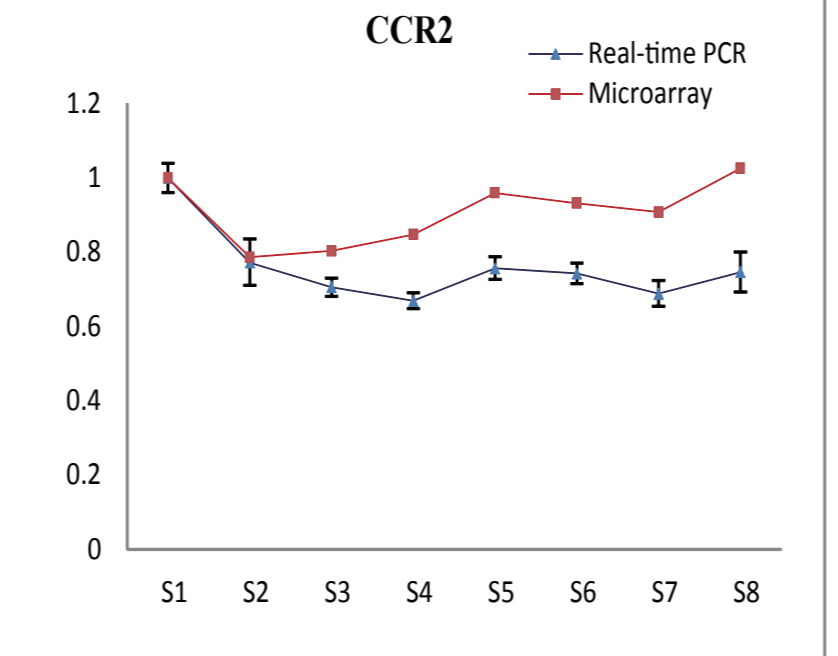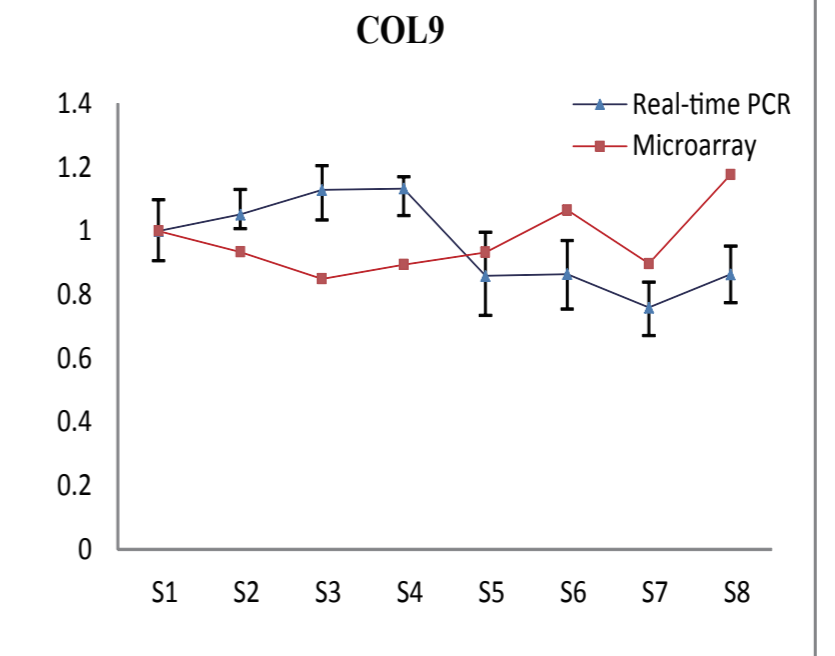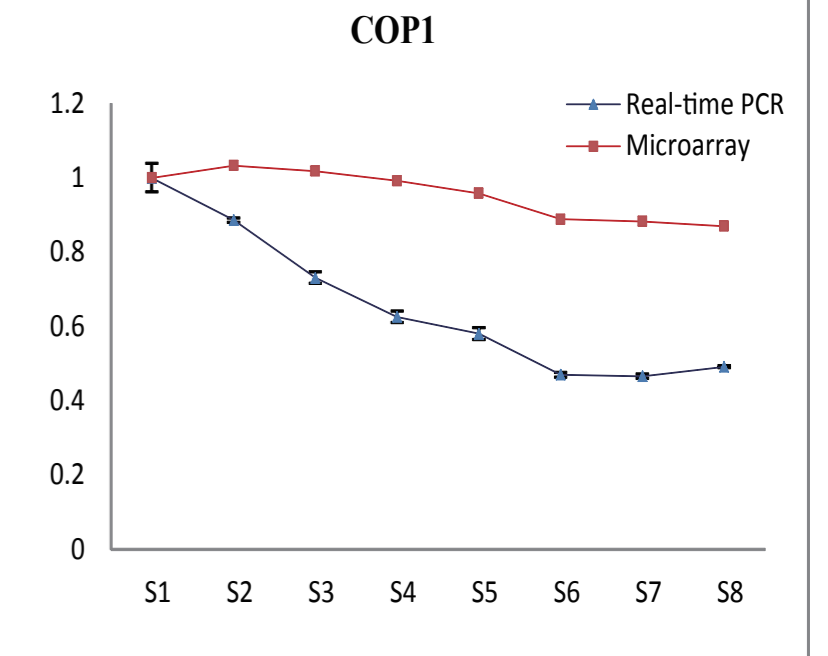

Relative expression quantity

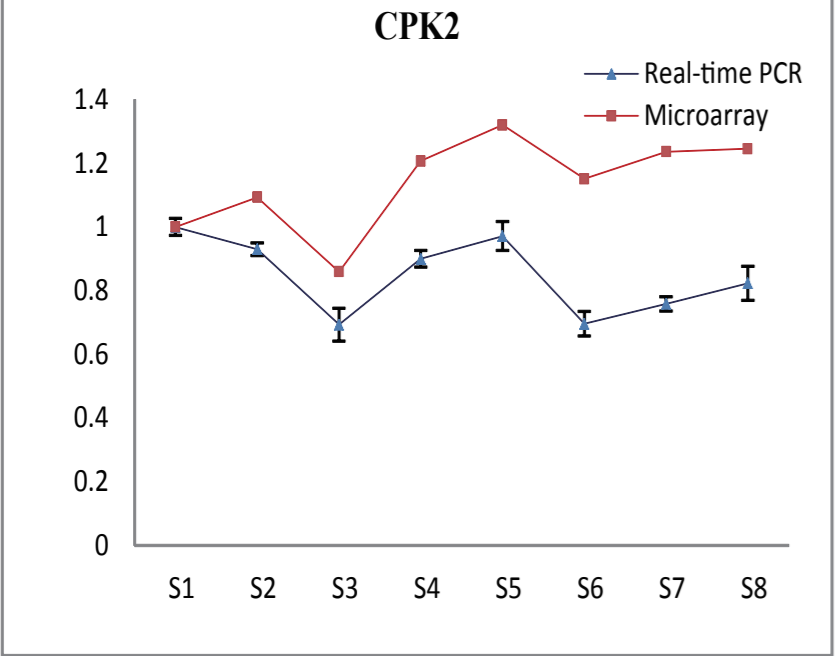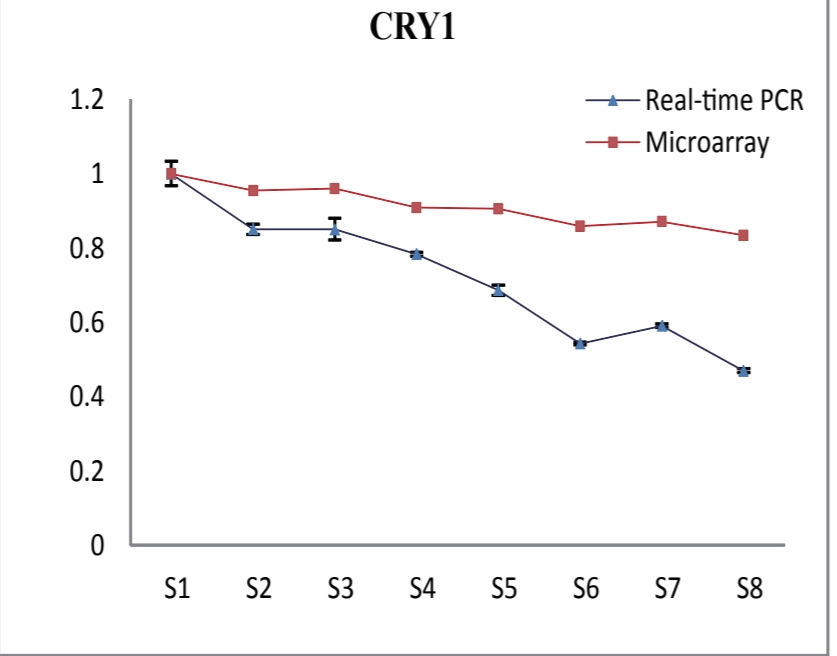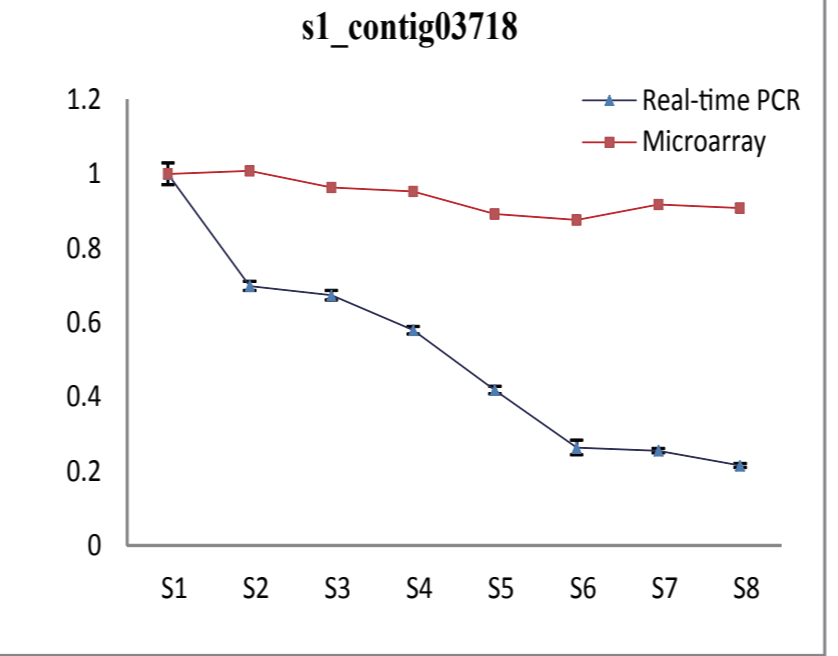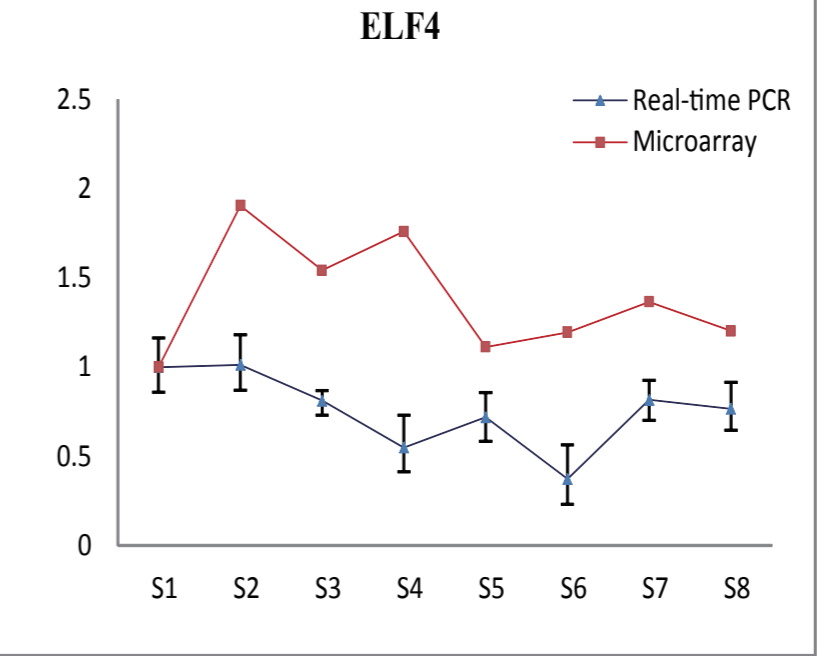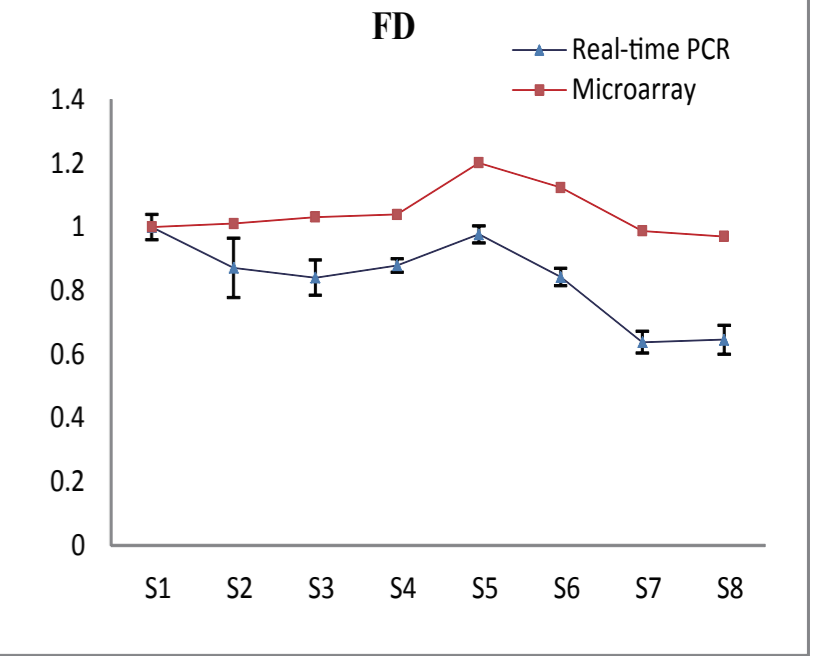

Relative expression quantity

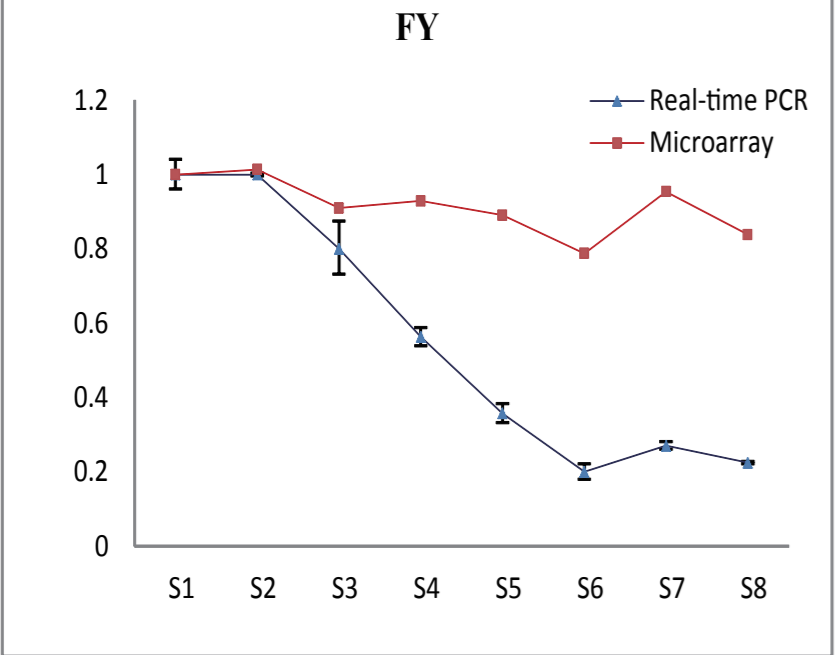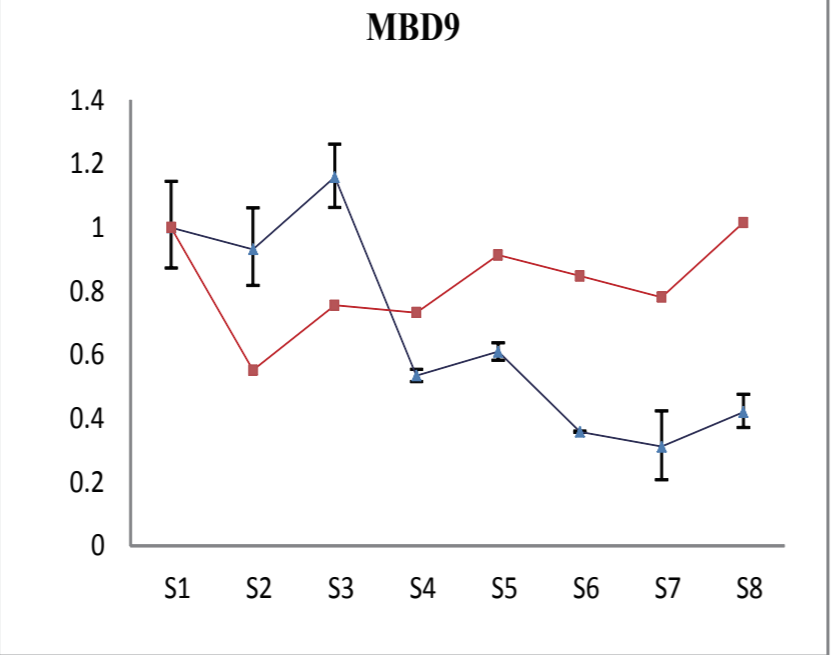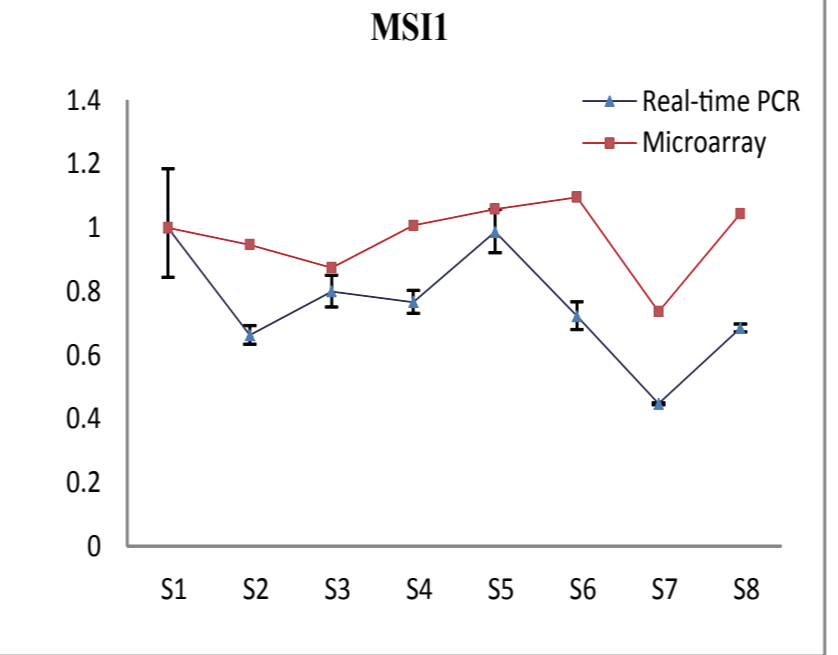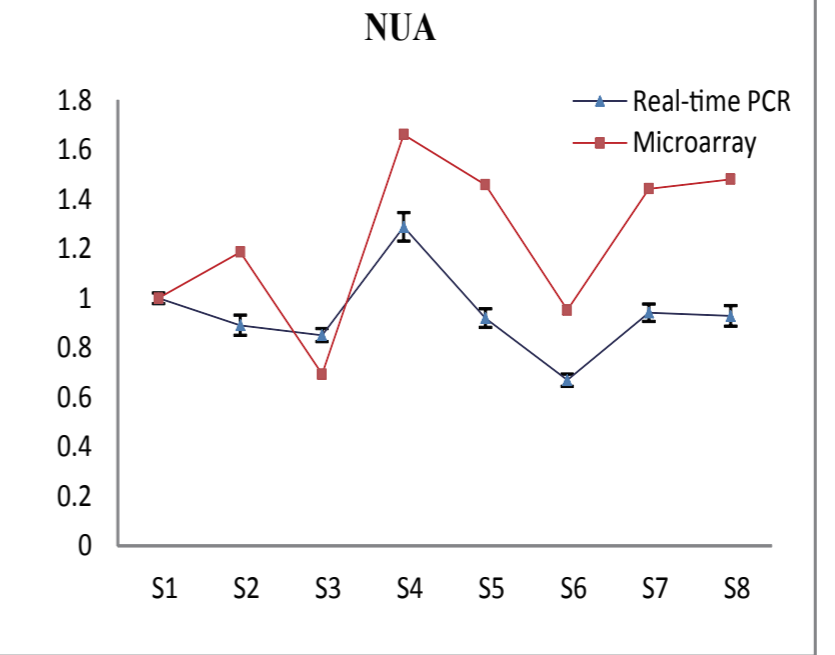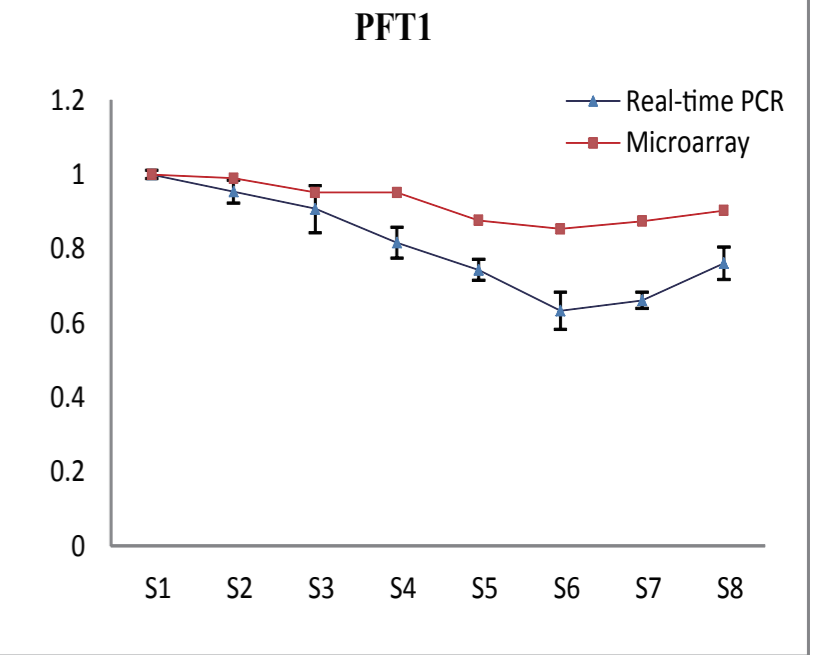

Relative expression quantity

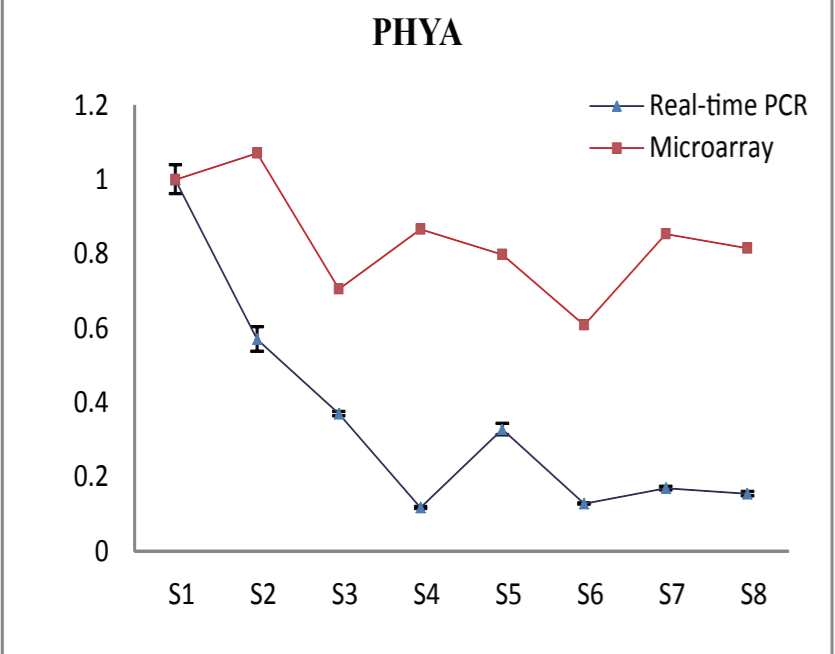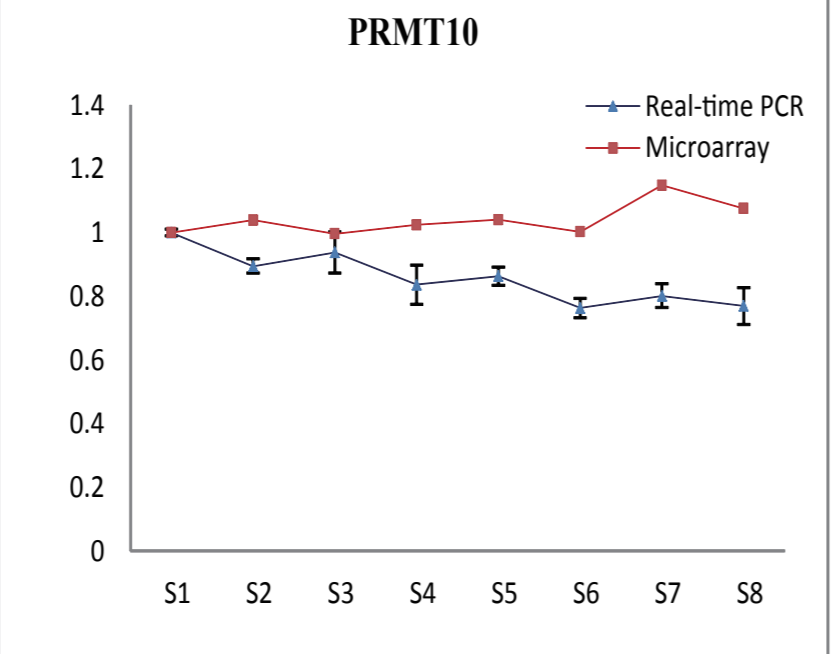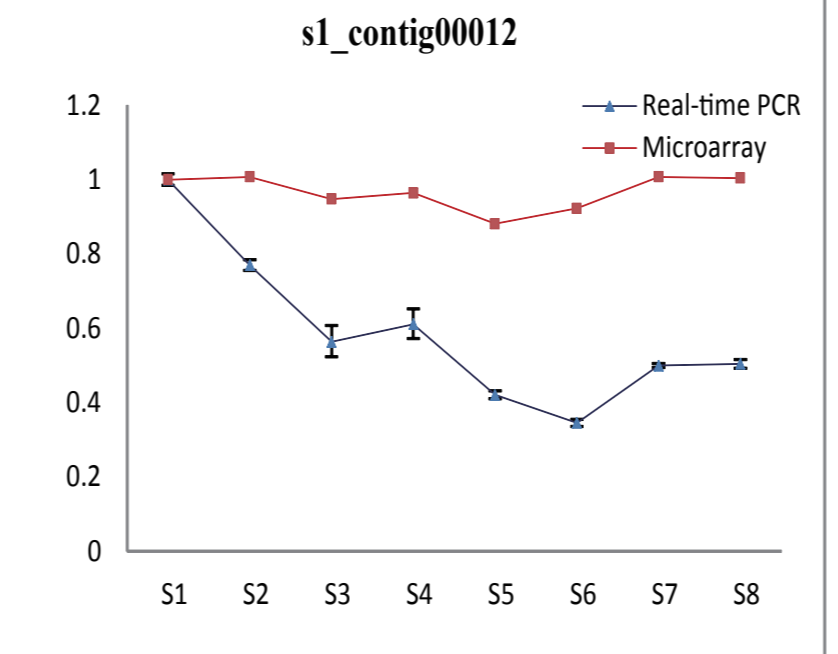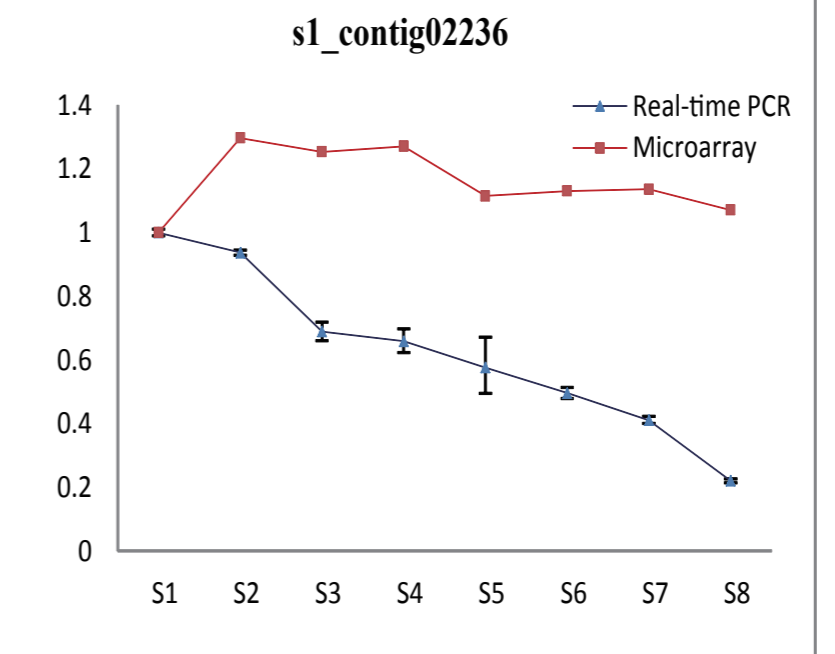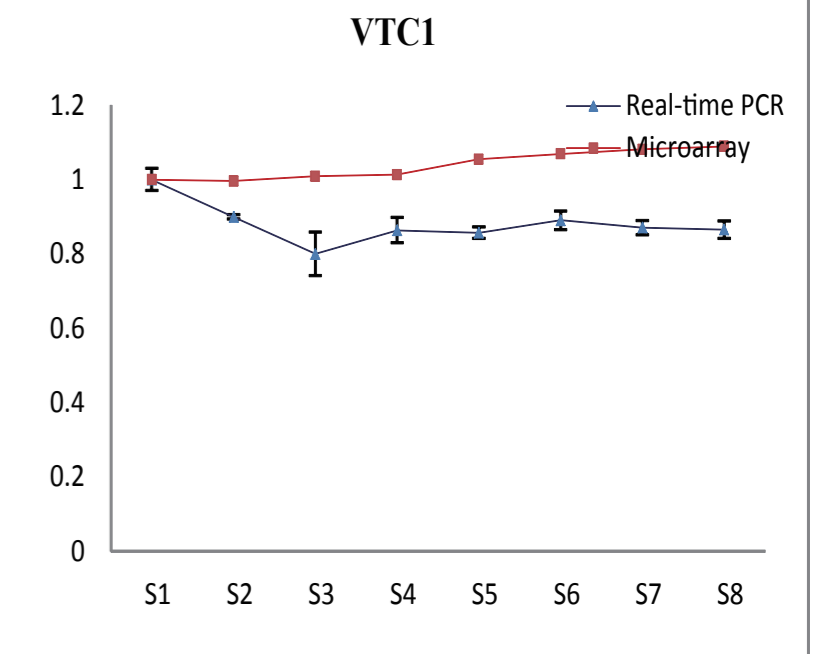

Relative expression quantity

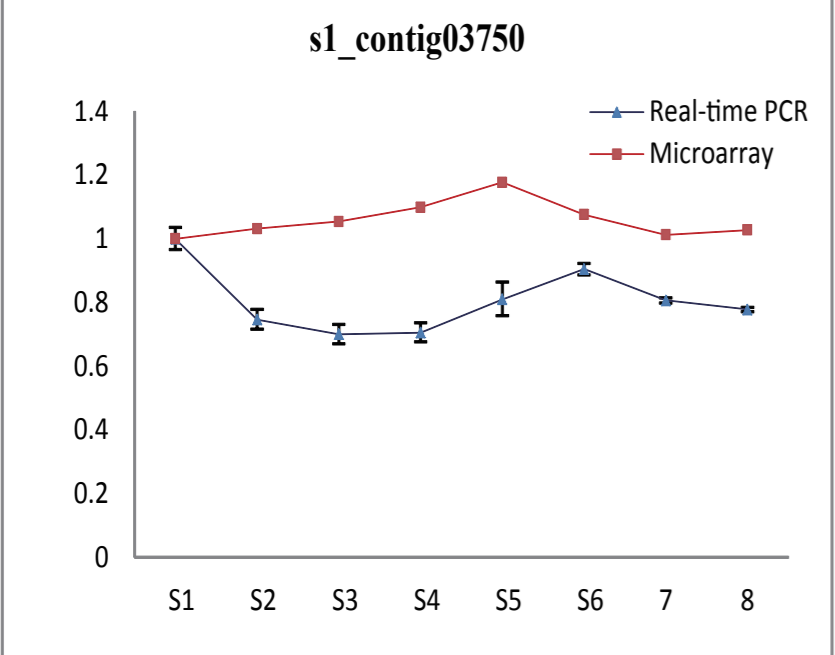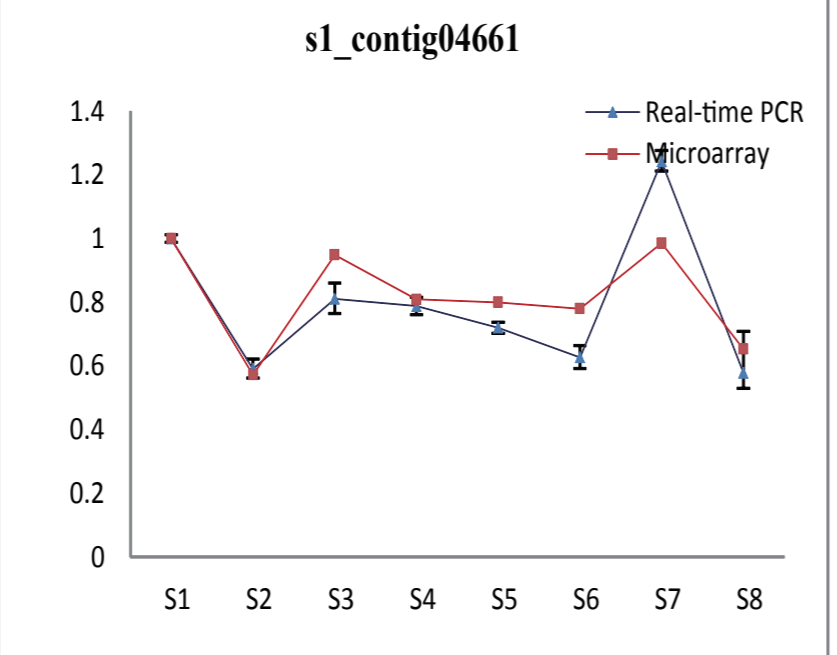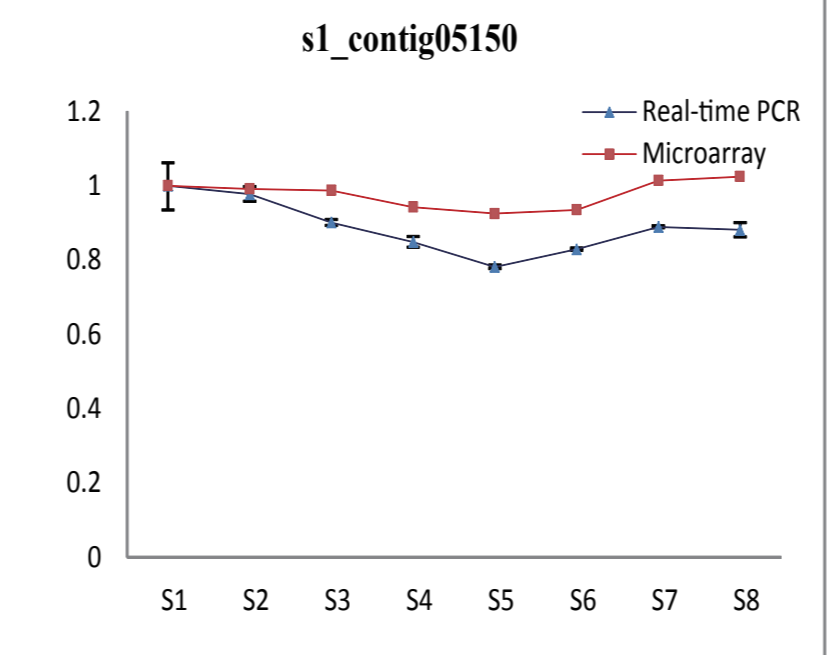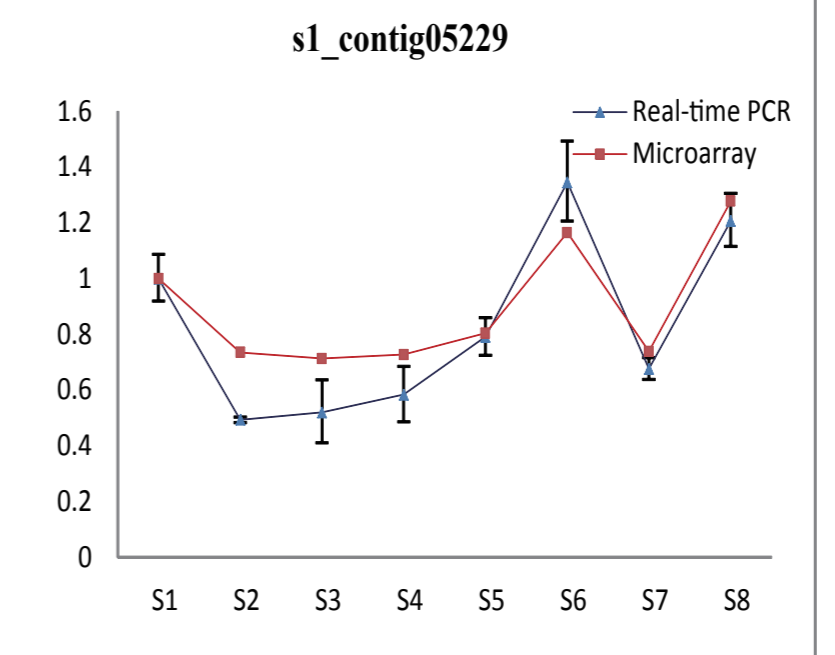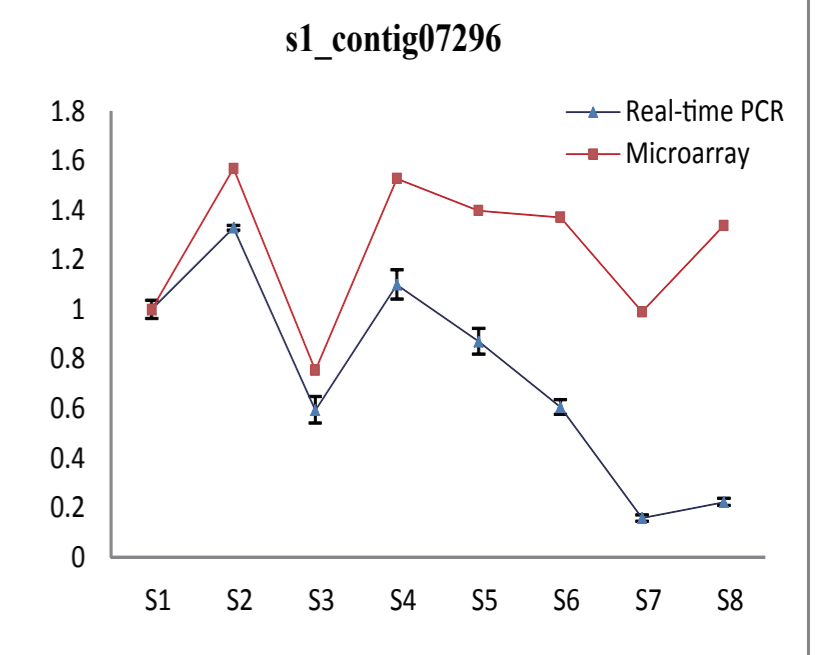

Relative expression quantity

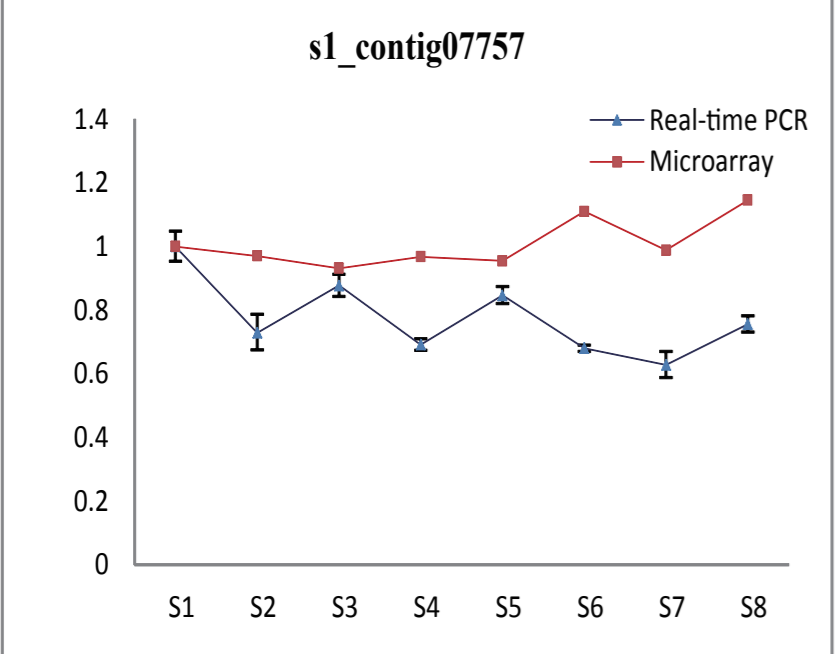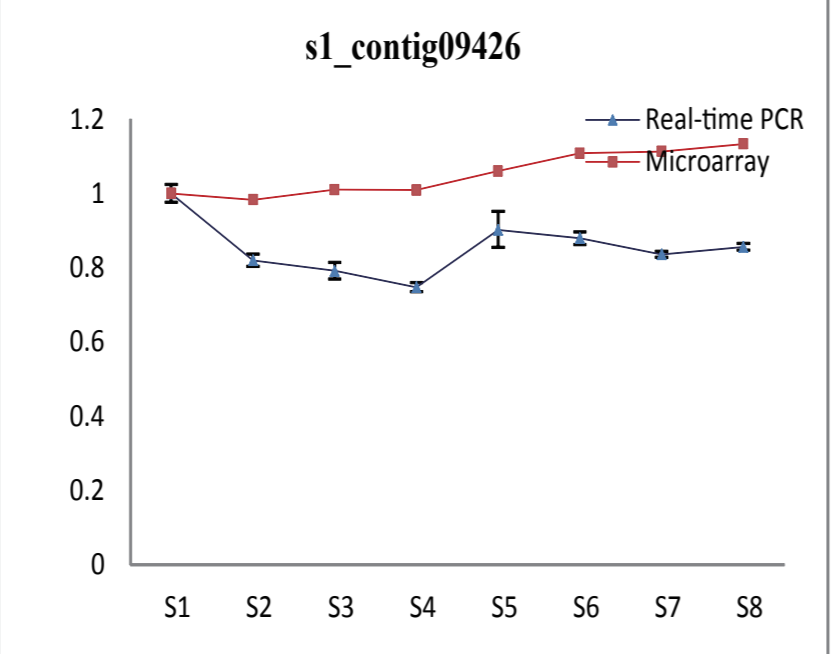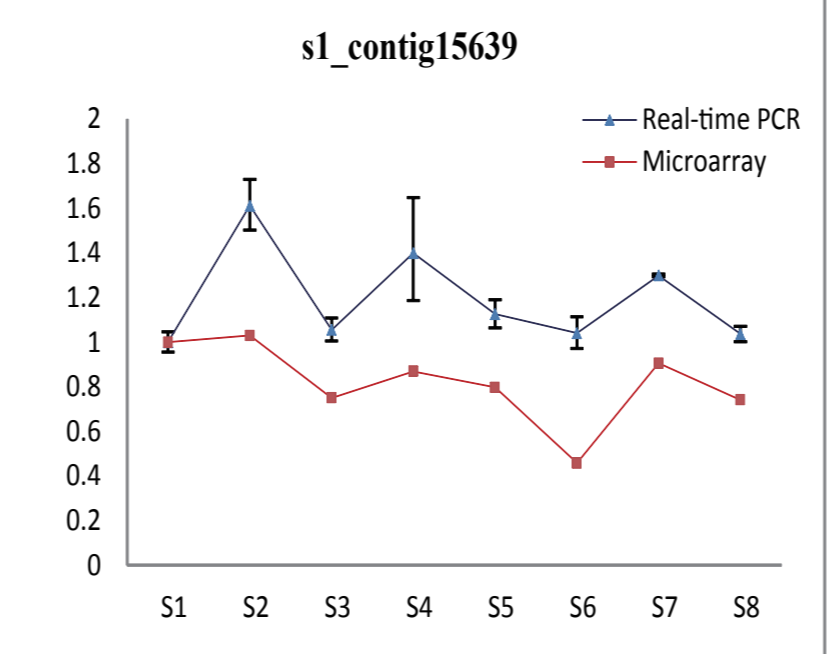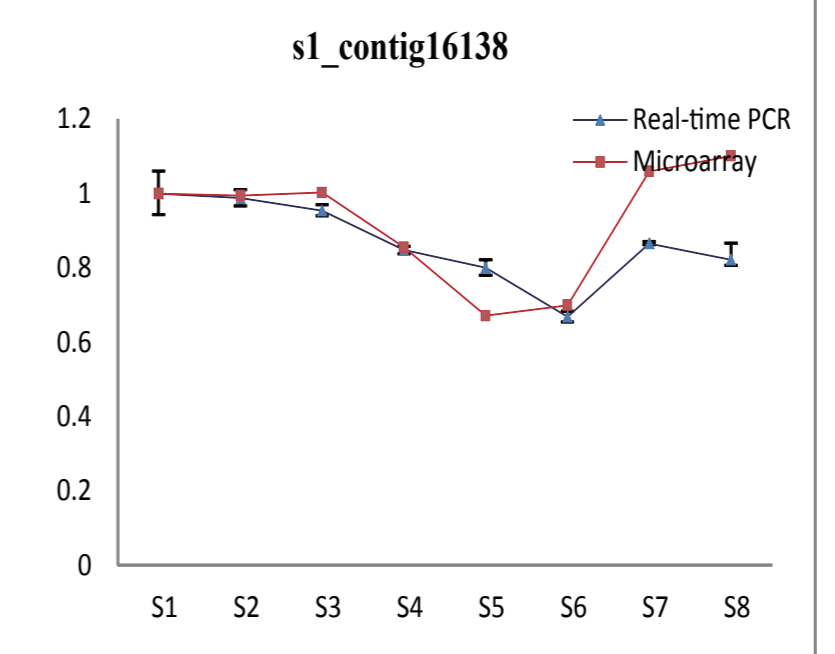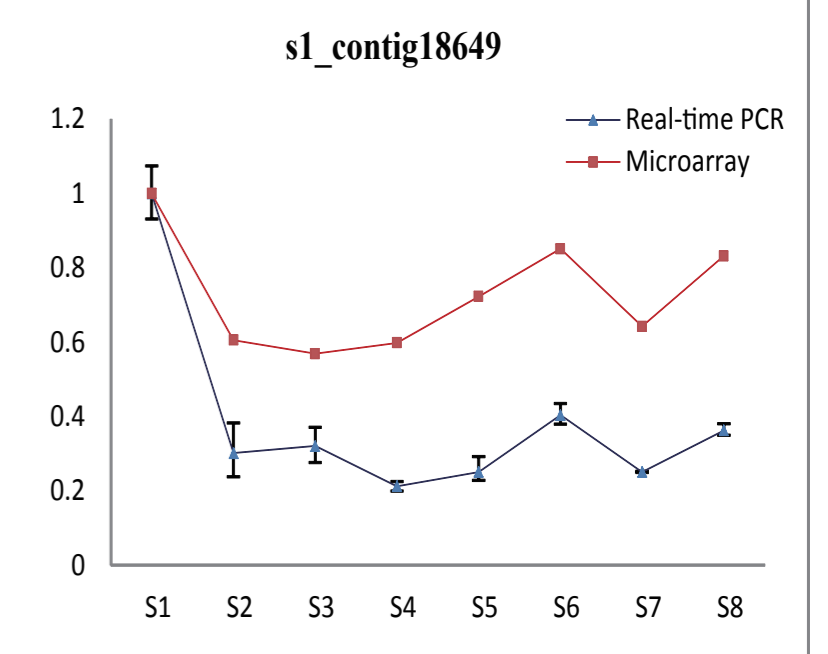

Relative expression quantity

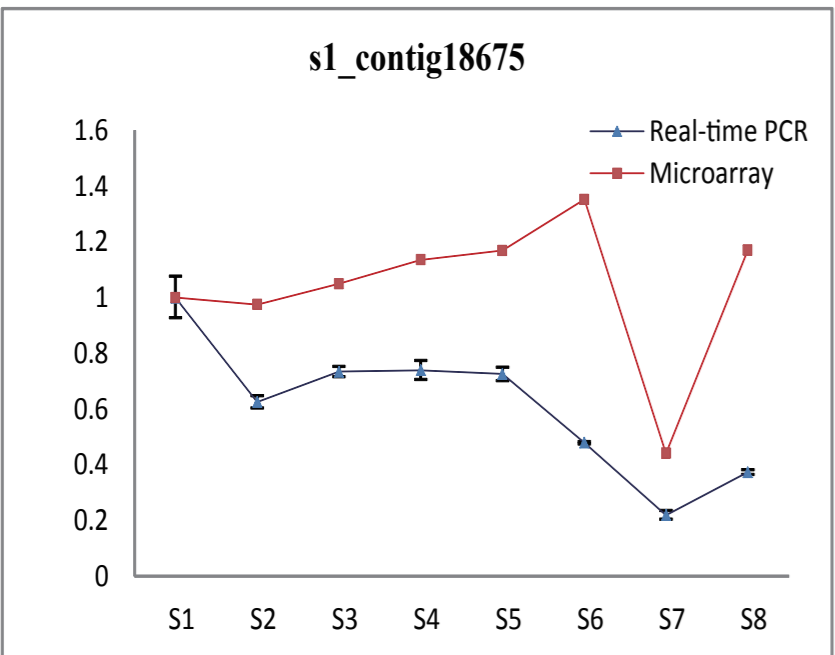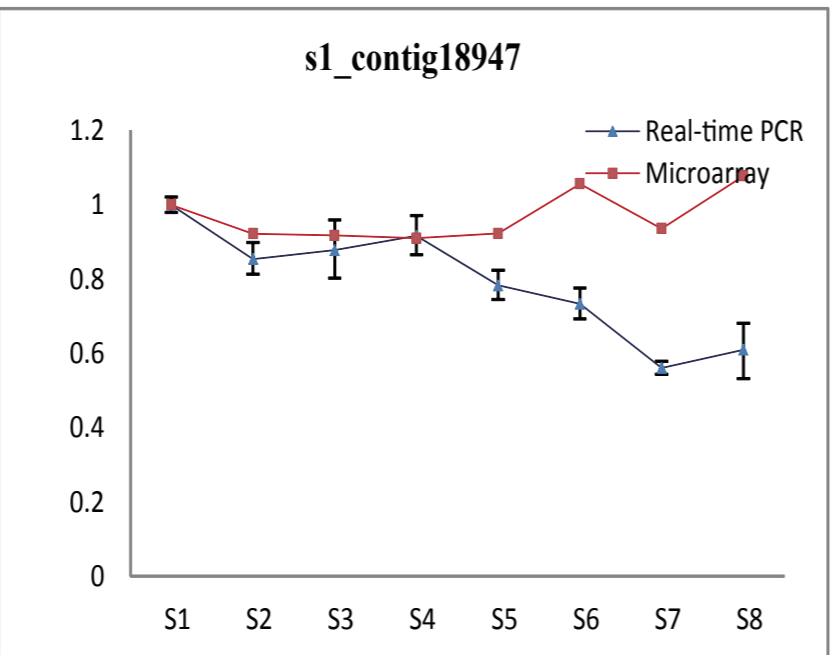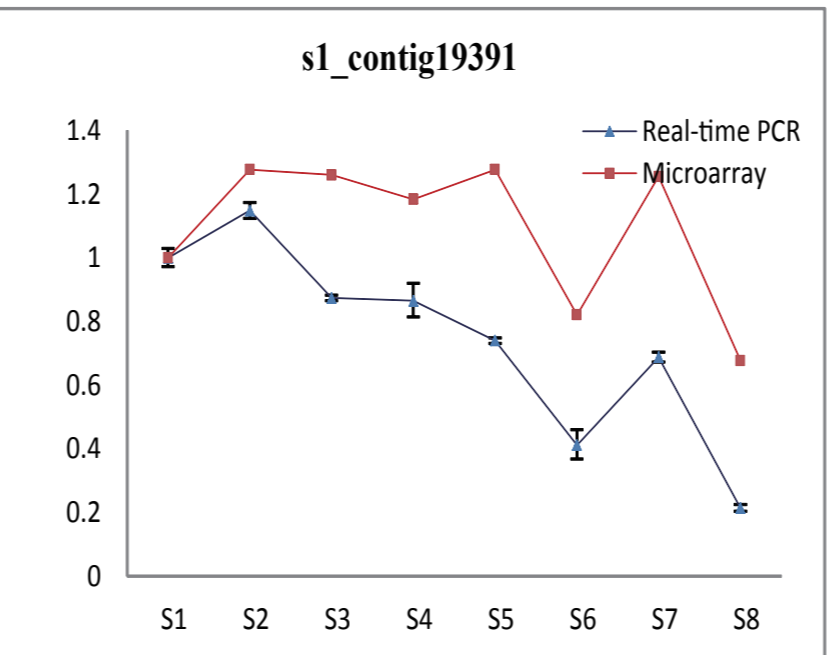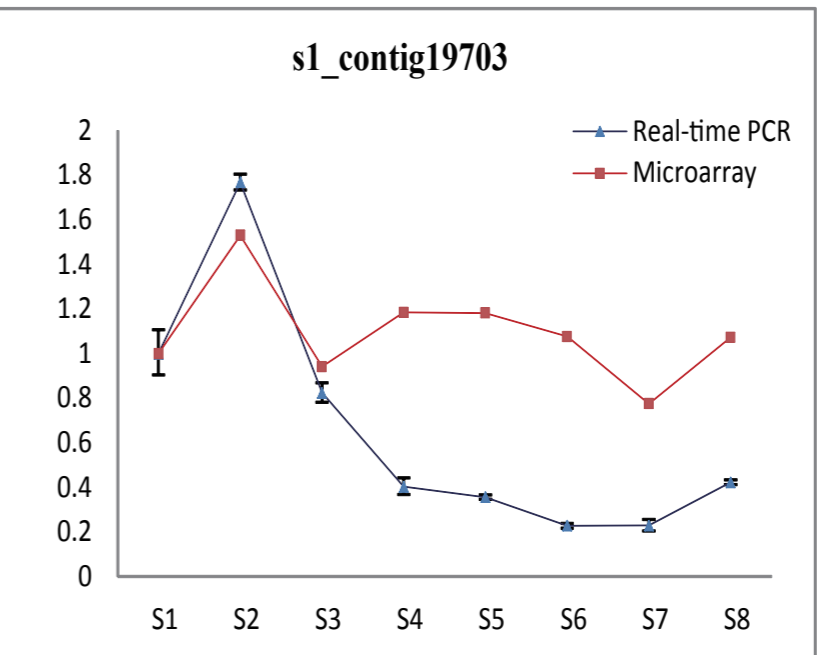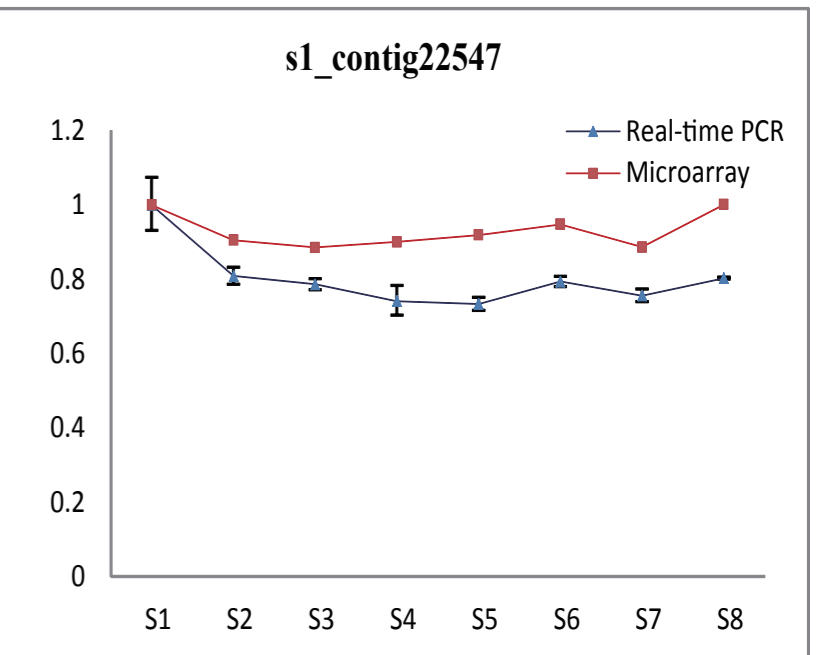

Supplement: Additional file 7: Figure S1 — Validation of microarray analysis and co-expression network. [file 1471-2164-14-691-S7.pdf]
