# Supplementary material for: Use of transcriptome sequencing to understand the pistillate flowering in hickory (Carya cathayensis Sarg.)
Source: PubMed Central journal article supplement (PMC3853572; doi:10.1186/1471-2164-14-691), 2013-10-10

**a**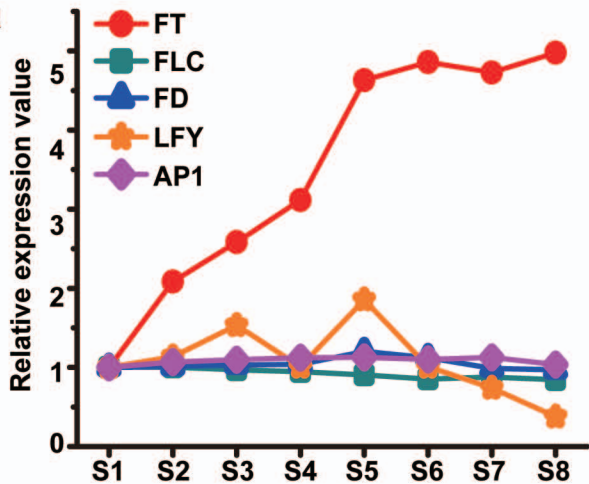**b**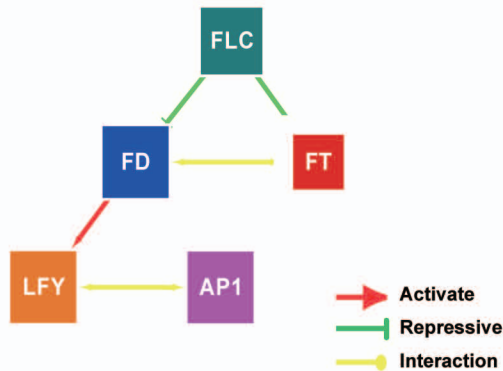

Supplement: 1471-2164-14-691-S8.pdf [file 1471-2164-14-691-S8.pdf]
