# Supplementary material for: Use of transcriptome sequencing to understand the pistillate flowering in hickory (Carya cathayensis Sarg.)
Source: PubMed Central journal article supplement (PMC3853572; doi:10.1186/1471-2164-14-691), 2013-10-10
Supplement: 1471-2164-14-691-S9.pdf [file 1471-2164-14-691-S9.pdf]

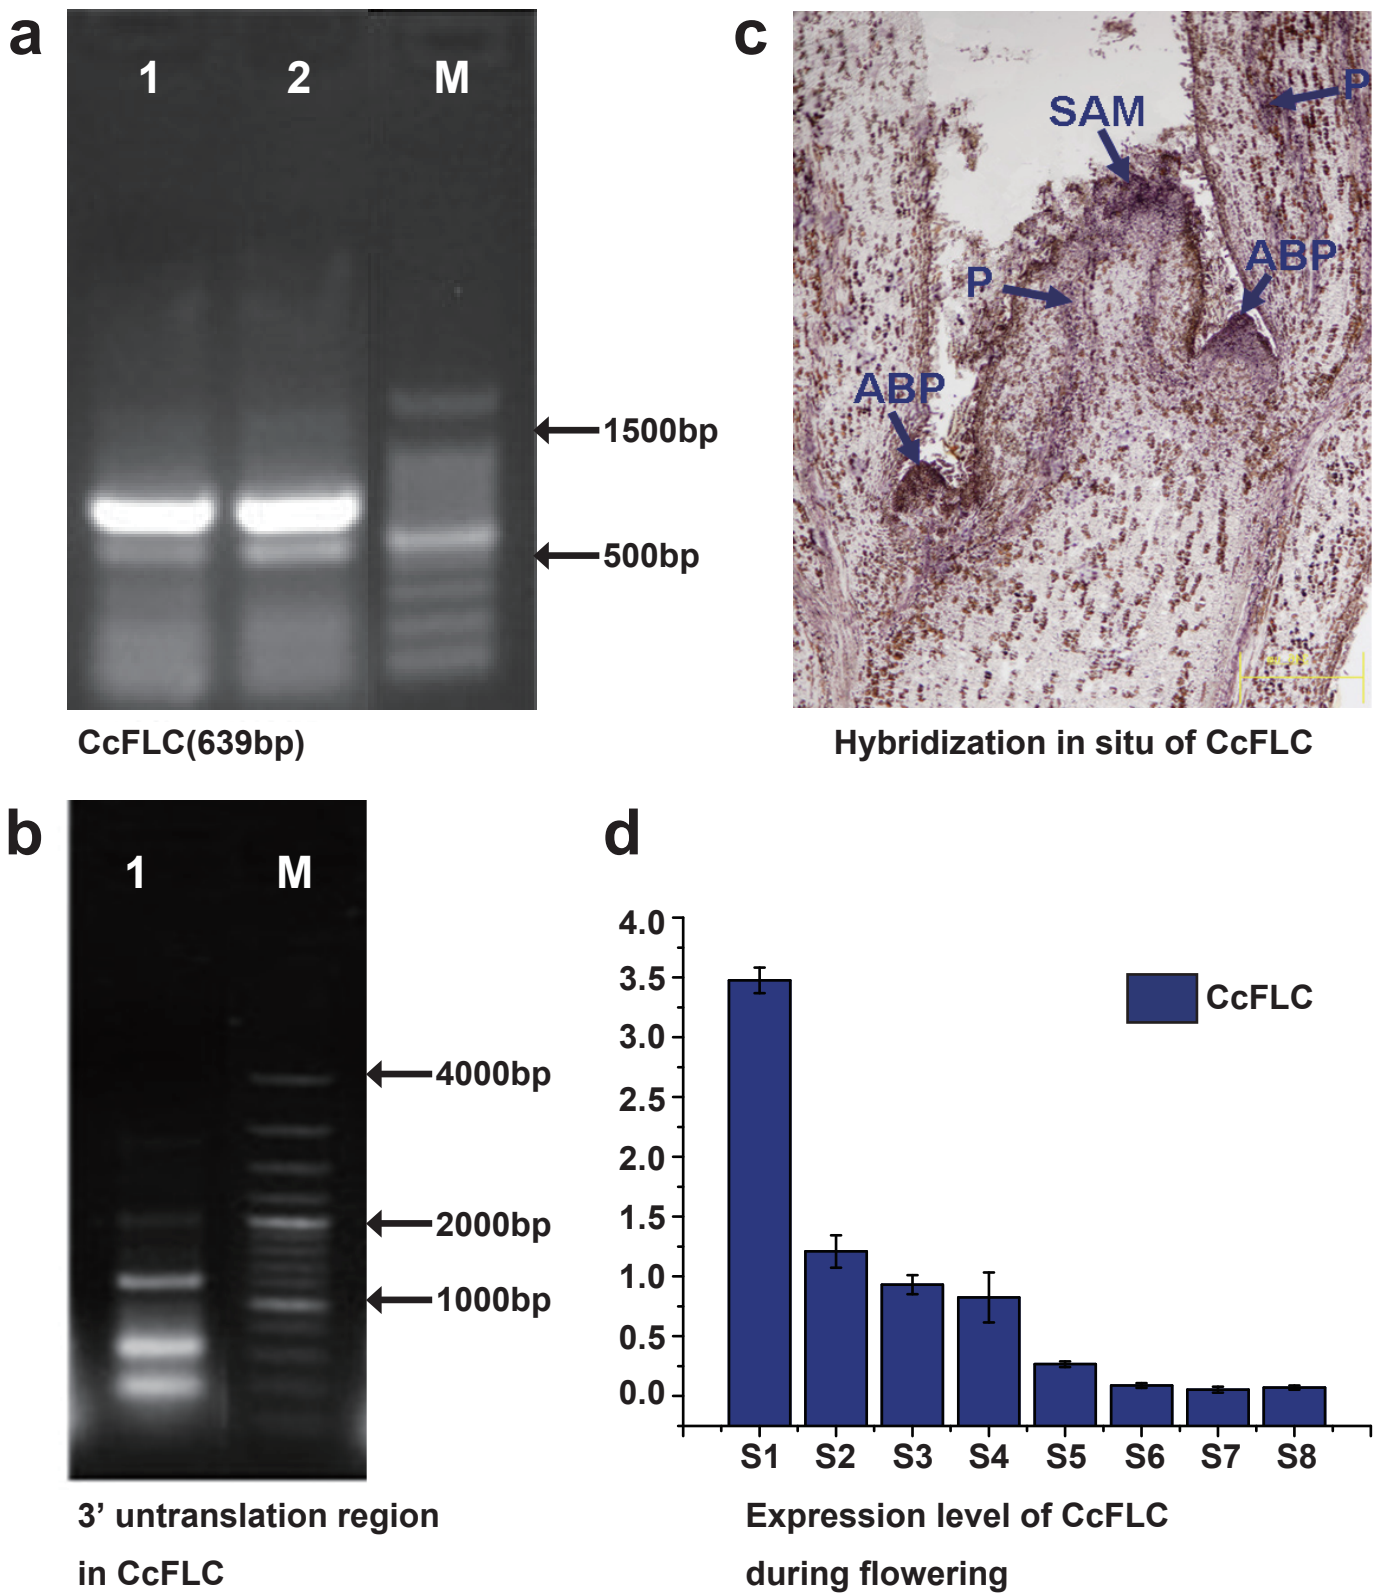

**Figure S2** Cloning and expressing characteristics of complete CcFLC mRNA. a: Cloning of complete CDS sequence of CcFLC in hickory. b: Cloning of 3' untranslation region in CcFLC via 3'RACE analysis. c: Hybridization in situ of CcFLC homolog in the pistillate flower bud. SAM: shoot apical meristem; ABP: axillary bud primordium; P: procambium. d: CcFLC homolog expression level during flowering.
